1 **Full Title: Self-Assembling Peptide Hydrogels - PeptiGels® as a Platform for Hepatic Organoid Culture**

2 **Short title: PeptiGels® to support organoid growth.**

3

4 Adedamola Olayanju <sup>a,b,\*</sup>, Aline F Miller <sup>a</sup>, Tahera Ansari <sup>c,d</sup>, Christopher E. Goldring <sup>b</sup>

5 <sup>a</sup> Manchester BIOGEL, Mereside, Alderley Park, Alderley Edge, Cheshire, SK10 4TG, UK

6 <sup>b</sup> MRC Centre for Drug Safety Science, Department of Molecular and Clinical Pharmacology, Institute  
7 of Translational Medicine, University of Liverpool, Liverpool, United Kingdom, L69 3GE.

8 <sup>c</sup> Faculty of Medical Science, Division of Surgery and Interventional Science, UCL, Gower St., London  
9 WC1E 6BT

10 <sup>d</sup> Tissue Engineering and Regenerative Medicine, Northwick Park Institute for Medical Research  
11 (NPIMR), Harrow, United Kingdom, HA1 3UJ.

12 **\* Corresponding author**

13 Dr Tahera Ansari

14 Email: [Tahera.ansari@ucl.ac.uk](mailto:Tahera.ansari@ucl.ac.uk)

15 Or

16 Dr Adedamola Olayanju

17 Email address: [adedamola.olayanju@liverpool.ac.uk](mailto:adedamola.olayanju@liverpool.ac.uk)

18

19 **Abbreviations:**

20 3D, 3-dimensional

21 DILI, Drug Induced Liver Injury

22 ECM, Extracellular Matrix

23 CK18, Cytokeratin-18

24

25 **Keywords:**

26 3D cultures, Organoids, Extracellular Matrix, Peptide Hydrogels, PeptiGels®

27 **Abstract**

28 A major challenge in advancing preclinical studies is the lack of robust in vitro culture systems that  
29 fully recapitulate the *in vivo* scenario together with limited clinical translational to humans. Organoids,  
30 as 3-dimensional (3D) self-replicating structures are increasingly being shown as powerful models for  
31 *ex vivo* experimentation in the field of regenerative medicine and drug discovery. Organoid formation  
32 requires the use of extracellular matrix (ECM) components to provide a 3D platform. However, the  
33 most commonly used ECM, essential for maintaining organoid growth is Matrigel and is derived from  
34 a tumorigenic source which limits its translational ability. PeptiGels® which are self-assembling  
35 peptide hydrogels present as alternatives to traditional ECM for use in 3D culture systems. Synthetic  
36 PeptiGels® are non-toxic, biocompatible, biodegradable and can be tuneable to simulate different  
37 tissue microenvironments. In this study, we validated the use of different types of PeptiGels® for  
38 porcine hepatic organoid growth. Hepatic organoids were assessed morphologically and using  
39 molecular techniques to determine the optimum PeptiGel® formulation. The outcome clearly  
40 demonstrated the ability of PeptiGel® to support organoid growth and offer themselves as a  
41 technological platform for 3D cultured physiologically and clinically relevant data.

42

## 43 **Introduction**

44 A major challenge in translating preclinical studies is the lack of robust *in vitro* culture systems that  
45 fully recapitulate the *in vivo* scenario. Most current models lack direct translational relevance to  
46 humans e.g. rodents hinder clinical adoption of emerging therapies due to the possibility of severe  
47 adverse reactions. This is particularly evident with drug induced liver injury (DILI) which accounts for  
48 more than 50% of acute liver failure (1). Although studies conducted in small rodent hold value in the  
49 understanding of fundamental concepts, the inability to fully extrapolate results to clinical findings  
50 has had a major impact in the acceleration of regenerative medicine, cell therapy and drug discovery.

51

52 Organoids, as 3-dimensional (3D) self-replicating structures are increasingly being shown as powerful  
53 models for *ex vivo* experimentation due to their ability to recapitulate and maintain physiological  
54 phenotypes of their tissues of origin (2). Organoids can overcome several limitations seen with 2D  
55 cultures such as de-differentiation and lack of cell-ECM communication leading to altered phenotypic  
56 expression. Additionally, the use of organoids may help to reduce the number of animals used in  
57 research, whilst still providing physiologically and clinically relevant data

58

59 Organoid formation requires the use of extracellular matrix (ECM) as a platform for the 3D  
60 conformation. Most ECMs used are animal-derived and have shown several limitations such as batch-  
61 to-batch variability, lack of tuneability and ease of use. In particular, Matrigel the most common, is  
62 derived from a tumorigenic source limiting its translational ability (3). Hence, there is a critical need  
63 for a synthetic alternative ECM in the generation of organoids.

64

65 Over recent years, significant resources have been directed at designing 3D scaffolds that mimic the  
66 ECM platforms including self-assembling peptides that can be hydrated to mimic the cellular niche (4).  
67 Of particular interest are synthetic and biologically relevant PeptiGel®, which are non-toxic,

68 biocompatible, and biodegradable. Their tuneable properties make them attractive platforms to  
69 simulate different tissue microenvironments.

70

71 An increasing number of studies have demonstrated the potential use of synthetic self-assembling  
72 peptides in culturing 3D cells to create physiologically and reproducibly relevant *in vitro* models that  
73 recapitulates the *in vivo* counterpart (4, 5). Self-assembling peptide hydrogels such as PeptiGels® are  
74 hydrogels made from short amino acid amphipathic peptides that self-assemble into  $\beta$ -sheet forming  
75 structures (6). Above a critical concentration, there is a formation of transparent hydrogel.  
76 Importantly, these peptide hydrogels are tuneable to give hydrogels of different mechanical and  
77 functional properties, hence having the ability to replicate different tissues of interest (6). Increasing  
78 evidence have shown that these self-assembling peptides are biocompatible and support the growth  
79 and propagation of different cell types in 3-dimensional conformation and have supporting roles to  
80 drive cell differentiation, model diseases and show potentials for other investigative biological  
81 functions (5, 7). The adoption of alternative synthetic ECM sources such as synthetic self-assembling  
82 peptide hydrogels PeptiGels® in the field of 3D cell culture may produce physiologically and clinically  
83 relevant data. Therefore, the aim of this study was to validate the use of PeptiGels® for the growth of  
84 organoids and to explore which formulation of PeptiGel® offers the optimal environment for hepatic  
85 organoids.

86

## 87 **Materials and Methods**

88 The use of Manchester BIOGEL PeptiGels® as an alternative source of ECM for the growth and  
89 maintenance of porcine hepatic organoids was investigated. All experiments were conducted in  
90 accordance with the Home Office Regulation on animal tissue usage.

91

92 Approx. 1 g of liver tissue was harvested from pigs undergoing termination from unrelated studies at  
93 NPIMR. A mixture of single cells were isolated from healthy porcine liver tissue and propagated (2) on  
94 five PeptiGels® (Alpha 1-5); each with a different mechanical property and/or charge (see table 1) with  
95 the aim of determining the optimum cell culture parameters. The resulting organoids were assessed  
96 for their 3D morphology using light microscopy techniques and compared to organoids grown on  
97 conventional ECMs i.e. Matrigel as it is the current gold standard in organoids generation and  
98 therefore used as a control. Matrigel and PeptiGel® generated organoids were lysed in RLT buffer and  
99 using Qiagen's RNeasy Mini Kit as instructed by the manufacturer was employed to extract RNA from  
100 Matrigel and PeptiGel®-generated organoids. The cDNA was synthesized using Promega's GoScript  
101 Reverse transcription systems as instructed by the manufacturer. The resulting Organoids cDNA were  
102 phenotyped by Real-time quantitative PCR for Cytokeratin-18 (CK18) and Gapdh gene expressions  
103 using Biorad CFX100 PCR instrument.

104

| PeptiGel® | Alpha 1 | Alpha 2 | Alpha 3 | Alpha 4 | Alpha 5 |
|-----------|---------|---------|---------|---------|---------|
| G' (kPa)  | 5       | 10      | 5       | 1       | 14      |
| Charge    | Neutral | Charged | Charged | Charged | Charged |

105

106 Table 1. The mechanical properties of different versions of PeptiGels®

107

108

109

## 110 **Results**

### 111 **Time course generation of hepatic organoids using PeptiGel® Technology**

112 PeptiGel®-generated organoid units were maintained in liver organoid media as described by Broutier  
113 *et al* (2). The seeded cells initially remained as single cells (days 1-2), but over time, cells started to  
114 coalesce to form the 3D structures (organoids). By day 6, they showed the classic organoid-like  
115 appearance involving the formation of a 3-dimensional structures with clusters of cells (Fig 1). Notably,  
116 hepatic cells grown in PeptiGel® Alpha 5 showed visible organoids by day 6. By day 13, they were fully  
117 formed organoids within the cultures with PeptiGels® 1, 2 and 3. An assessment of the organoids  
118 demonstrated that the hepatic cells showed different morphologies when grown on different versions  
119 of the PeptiGels® when compared to the control organoids grown on Matrigel (Fig. 1). PeptiGel®-  
120 generated organoids using Alpha 1 showed organoid like structures by day 14 but by day 27, they had  
121 fully dissociated. PeptiGel®-generated organoids using PeptiGels® Alpha 2-4 showed similar  
122 morphologies to the those grown on PeptiGel® Alpha 1 but those generated using PeptiGel® Alpha 2  
123 showed a higher rate of formation compared to those grown on PeptiGels® Alpha 3 and Alpha 4. (Fig.  
124 1). Notably, organoids generated using PeptiGel® Alpha 2 were similar to those grown using Matrigel.

125

126

127 **Figure 1: PeptiGel®-generated hepatic organoids.** Time course establishment of porcine liver  
128 organoids using PeptiGels® technology platform. Scale bar is 100 µm.

129

### 130 **RNA extraction and PCR analysis of Cytokeratin-18 genes from PeptiGel®-generated organoids**

131 Having established that self-assembling peptide hydrogels such as PeptiGels® offered a platform for  
132 generating 3D organoids, we assessed whether PeptiGel®-generated organoids were compatible with  
133 current methods for RNA isolation, specifically to assess if there was any potential interaction between  
134 RNA in the organoids and the biomaterial and to validate that the organoid were in fact liver specific  
135 organoids.

136

137 RNA was extracted and detected in the organoids generated from PeptiGels® but was lower when  
138 compared to RNA extracted from Matrigel (Fig. 2A). When comparing the organoids grown in  
139 PeptiGels®, PeptiGel® Alpha 2 organoids had the highest RNA concentration followed by PeptiGel®  
140 Alpha 4 organoids. The high values in PeptiGel® Alpha 2 organoids could be due to the higher  
141 expression of organoids seen with the cultures (Fig. 1). PeptiGels® Alpha 3, 1 and 5 had the lowest  
142 values respectively and may be due to the low formation of the organoids in these cultures and/or the  
143 formation of peptide fibrils between the gel and the RNA.

144

145 **Figure 2A: RNA Measurements in PeptiGel® and Matrigel-organoids.** Measurements were taken  
146 using Nanodrop ND1000, Thermo Scientific, Wilmington, USA. All data represent the mean + SD of  
147 n=3 samples.

148

149 Real-time quantitative PCR analysis of Cytokeratin-18 (CK18) gene and Gapdh was performed to check  
150 if the RNA extracted from the PeptiGel®-organoids were compatible with common genetic analysis  
151 such as PCR and if they expressed cell markers. For primer sequences, see supplementary table 1. All  
152 PeptiGel®-organoids express CK18, a marker of epithelial cells (Fig. 2B). They also expressed Gapdh as  
153 a loading control. Although, there were low expression of these genes in these samples which could  
154 be due to the initial RNA normalisation of all samples to the sample with the lowest RNA value  
155 (PeptiGel® Alpha 5-organoid) which means the starting RNA value to be synthesized was low.  
156 However, these genes were still shown to be expressed indicating the presence of epithelial cells in all  
157 the PeptiGel® cultures.

158

159 **Figure 2B: PeptiGel®-organoids express epithelial cell marker CK18 gene.** Real-time quantitative PCR  
160 analysis of CK18 gene in PeptiGel® generated organoids. CK18 gene level was normalised to the  
161 loading control, Gapdh, and expressed as a percentage of CK18 level of the pooled control. All data

162 represent the mean + SD of  $n=3$  experiments. Statistical analyses were performed using an  
163 unpaired  $t$  test ( $*P<0.05$  vs pooled control).

164

165



166 **Discussion**

167 PeptiGels® were assessed to determine their potential ability to support the growth and development  
168 of organoids with appropriate morphology and the expression of tissue-specific markers. We have  
169 shown that it is possible to use PeptiGels® as platforms to generate organoids derived from porcine  
170 hepatic cells. In particular, PeptiGel® Alpha 2 generated organoids with a classic hepatic organoid  
171 phenotype and interestingly the mechanical properties of PeptiGel® Alpha 2 is  $G'$  prime of 10kPa and  
172 correlates to that seen in diseased liver tissue (8). PeptiGel® Alpha 5 generated organoids showed  
173 more branching when compared to the other organoids. This change in morphology may be have been  
174 influenced by the mechanical property of the gel (14kPa). As such, this may represent a suitable *in*  
175 *vitro* model for investigating the dynamics associated with fibrotic livers, where the tissue is stiffer  
176 than normal. The present investigation needs to be expanded to confirm that the organoids generated  
177 using PeptiGel® behave as expected with regards to cryopreservation, the passaging of the organoids,  
178 and the growth of organoids for an extended period of time. In addition, more robust internal cellular  
179 morphological analysis, differentiation and spatial arrangement of cells, proteomic and genotypic  
180 phenotyping and how these parameters evolve with time requires further investigation. Furthermore,  
181 the use of functionalised PeptiGels® such as in the incorporation of Integrin peptide motifs (RGD),  
182 Laminin peptide motifs (IKVAV, YIGSR) or Collagen peptide motif (GFOGER) with variable mechanical  
183 strengths will be explored to fine-tune the generation of hepatic organoids.

184

185 The recapitulation of the *in vivo* counterpart by cells grown in 3D matrices requires an analysis of the  
186 genetic or protein responses in the matrices; analysis of which requires good quality RNA or protein  
187 for further downstream PCR analysis. Hence, a preliminary phenotyping of the PeptiGel®-generated  
188 organoids using PCR was carried out to assess the presence of tissue-specific markers. RNA was  
189 successfully extracted using a column-based approach, however, the yield observed in this study was  
190 low compared to the extraction in Matrigel-generated organoids (Fig. 2A). This reduction in the yield  
191 was probably due to the presence of fibrils. A study by Burgess *et al.*, 2018 (9) undertook a

192 comparative analysis of RNA extraction from cells encapsulated in self-assembling peptide hydrogels  
193 using two different extraction principles: solution-based extraction and direct solid-state binding of  
194 RNA and showed the latter was a more efficient method of extraction (9). In line with this study, we  
195 have shown that the use of a direct solid-state binding of RNA extraction method allowed the  
196 extraction of RNA of PeptiGel®-organoids. Burgess *et al.*, also showed that the use of pronase, a broad-  
197 spectrum enzyme solution reduced the amount of fibril present and increased RNA yield (9).  
198 Therefore, future investigation will aim to increase the yield of the RNA content by employing the use  
199 and impact of pronase to digest the organoids lysate before being subjected to RNA analysis.

200

201 cDNA was synthesized from the extracted RNA from PeptiGel®-generated organoids and the  
202 expression of CK18 (epithelial cell marker) and Gapdh (housekeeping) genes was carried out using  
203 PCR. CK18 and Gapdh was expressed in all PeptiGels® platforms used (Fig. 2B). The low expression of  
204 these genes seen may in part be due to the low yield of RNA content and initial RNA normalisation of  
205 all samples to the sample with the lowest RNA value (PeptiGel® Alpha 5-organoid) which means the  
206 starting RNA value to be synthesized was low. However, these genes were still shown to be expressed  
207 and their expression could be improved upon by increasing the starting sample RNA concentration.

208

209 We believe this is the first report to show that self-assembling peptides-PeptiGels® can be used for  
210 the generation of hepatic organoids. Organoids have been shown to be powerful preclinical models  
211 to accelerate clinical developments. However, organoids generated using animal-derived ECM have  
212 limitations in areas of safety and ethical use. PeptiGel®-generated organoids may therefore enhance  
213 translational research. This is envisaged to have a substantial impact in the development of  
214 regenerative medicine and accelerate drug discovery processes. Our present findings show the  
215 potential of PeptiGel® technology platform as a suitable alternative to ECM required for organoid  
216 culture and as such, may have huge applications in the development of cellular therapeutic diagnostic

217 tool, translation of *in vitro* data to appropriate and robust preclinical studies and eventual clinical  
218 application.

219

## 220 **Acknowledgement**

221 The authors are grateful for the financial support received from 3DBioNet Collaborative grant, the  
222 donation of PeptiGels® from Manchester BIOGEL and porcine tissue from NPIMR.

223

224 **References**

- 225 1. Ostapowicz G, Fontana RJ, Schiodt FV, Larson A, Davern TJ, Han SH, et al. Results of a  
226 prospective study of acute liver failure at 17 tertiary care centers in the United States. *Ann Intern Med.*  
227 2002;137(12):947-54.
- 228 2. Broutier L, Andersson-Rolf A, Hindley CJ, Boj SF, Clevers H, Koo BK, et al. Culture and  
229 establishment of self-renewing human and mouse adult liver and pancreas 3D organoids and their  
230 genetic manipulation. *Nat Protoc.* 2016;11(9):1724-43.
- 231 3. Kleinman HK, McGarvey ML, Hassell JR, Star VL, Cannon FB, Laurie GW, et al. Basement  
232 membrane complexes with biological activity. *Biochemistry.* 1986;25(2):312-8.
- 233 4. Aline F. Miller AS. Engineering peptide based biomaterials. *Chemistry Today.* 2010;28(1):4.
- 234 5. Faroni A, Workman VL, Saiani A, Reid AJ. Self-Assembling Peptide Hydrogel Matrices Improve  
235 the Neurotrophic Potential of Human Adipose-Derived Stem Cells. *Adv Healthc Mater.*  
236 2019;8(17):e1900410.
- 237 6. Roberts D, Rochas C, Saiani A, Miller AF. Effect of peptide and guest charge on the structural,  
238 mechanical and release properties of beta-sheet forming peptides. *Langmuir.* 2012;28(46):16196-206.
- 239 7. Kumar DW, Victoria; O'Brien, Marie Claire; McLaren, Jane S.; White, Lisa J.; Rangunath, Krish;  
240 Saiani, Alberto; Gough, Julie; Rose, Felicity R.A.J. . Peptide hydrogels — a tissue engineering strategy  
241 for the prevention of oesophageal strictures *Advanced Functional Materials.* 2017;27(38):1702424.
- 242 8. Berger A, Shili S, Zuberbuhler F, Hiriart JB, Lannes A, Chermak F, et al. Liver Stiffness  
243 Measurement With FibroScan: Use the Right Probe in the Right Conditions! *Clin Transl Gastroenterol.*  
244 2019;10(4):e00023.
- 245 9. Burgess KA, Workman VL, Elsayy MA, Miller AF, Oceandy D, Saiani A. RNA extraction from  
246 self-assembling peptide hydrogels to allow qPCR analysis of encapsulated cells. *PLoS One.*  
247 2018;13(6):e0197517.

248

249

250

251

252

253

254

255

256

257

258

259

260 **Supplementary Table 1: List of genes and primer sequences**

261

| List of Genes | Primer Sequences 5' – 3' end  |
|---------------|-------------------------------|
| CK18          | Forward: GTGGAGAGTGACATCCACGG |
|               | Reverse: CCTCTCGGTTCTTCTGAGCC |
| GAPDH         | Forward: CGTGTCGGTTGTGGATCT   |
|               | Reverse: CTCAGTGTAGCCCAGGAT   |

262

# PeptiGel®-generated Organoids

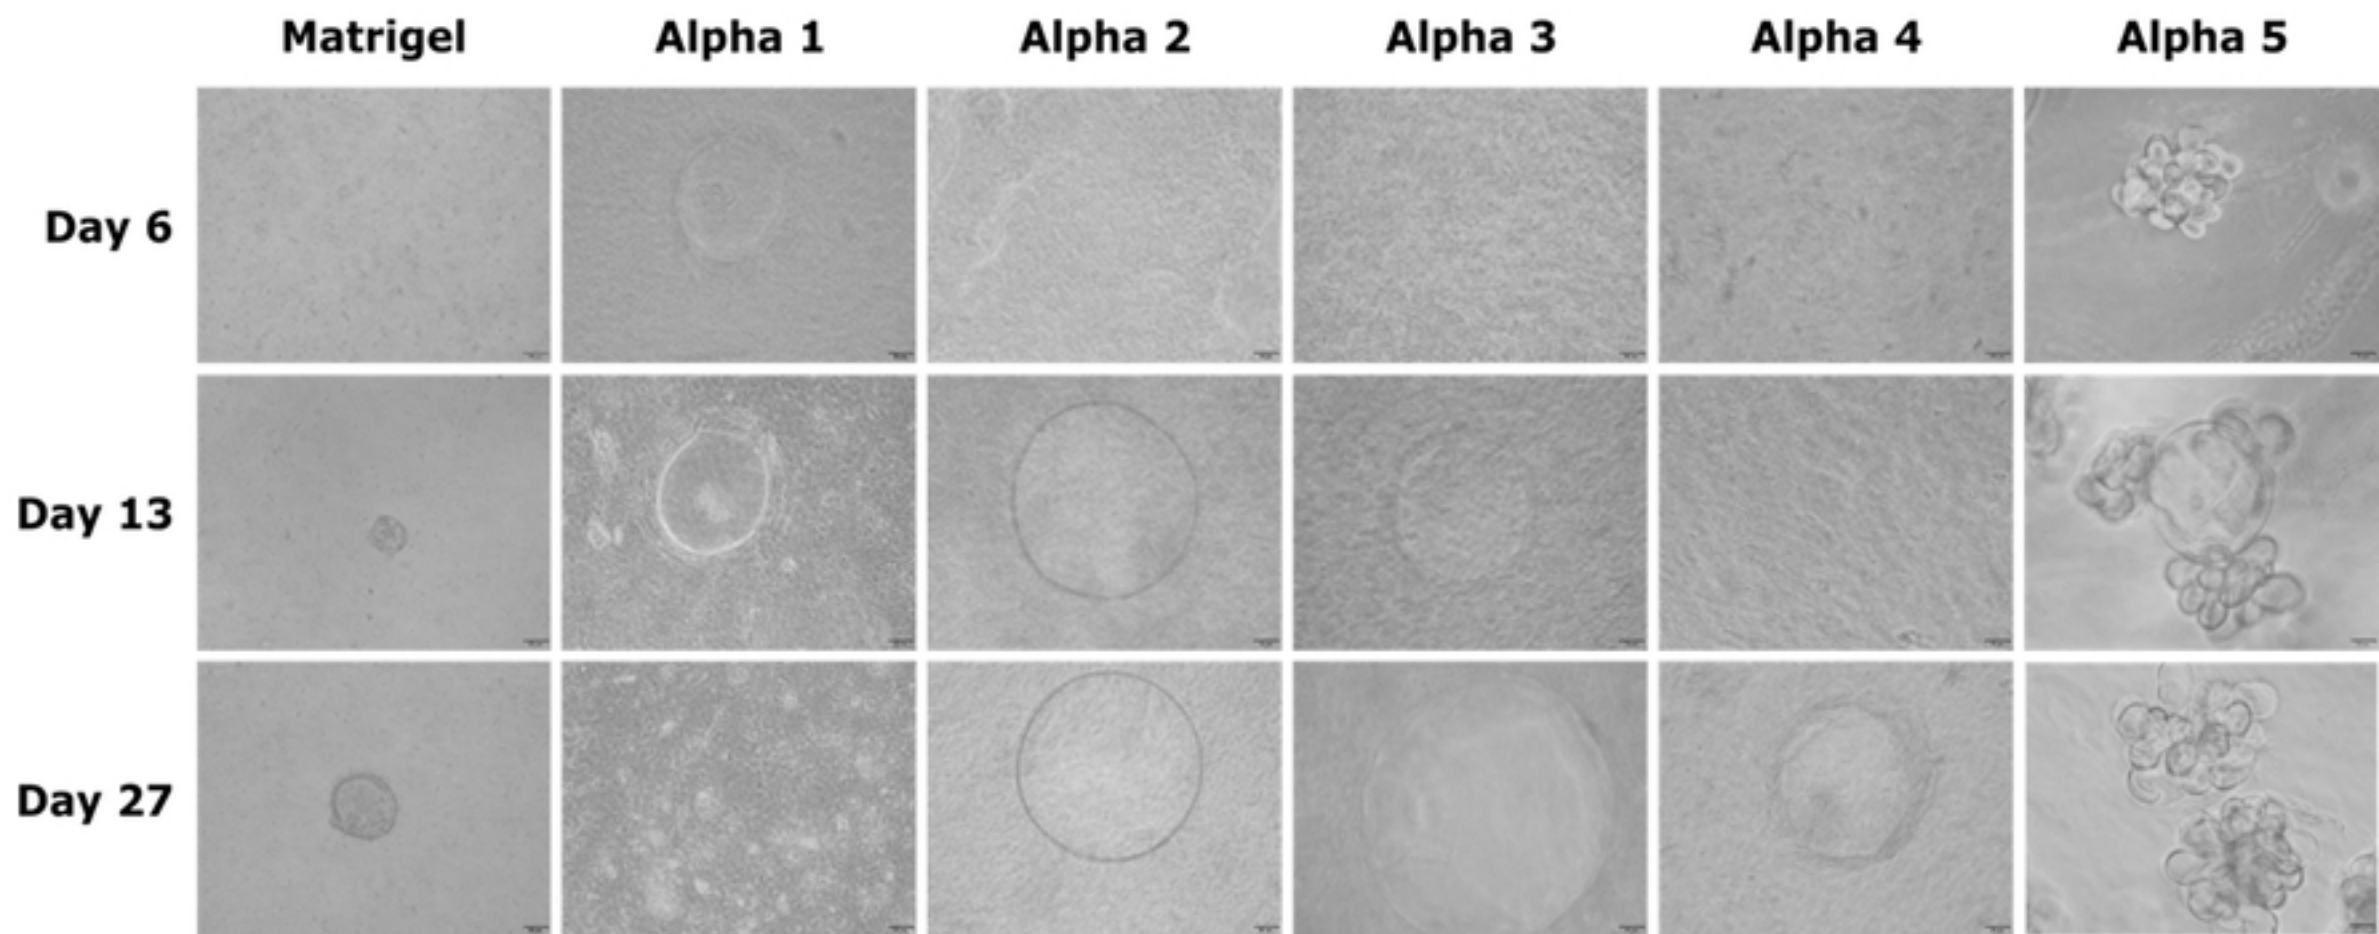

Figure 1

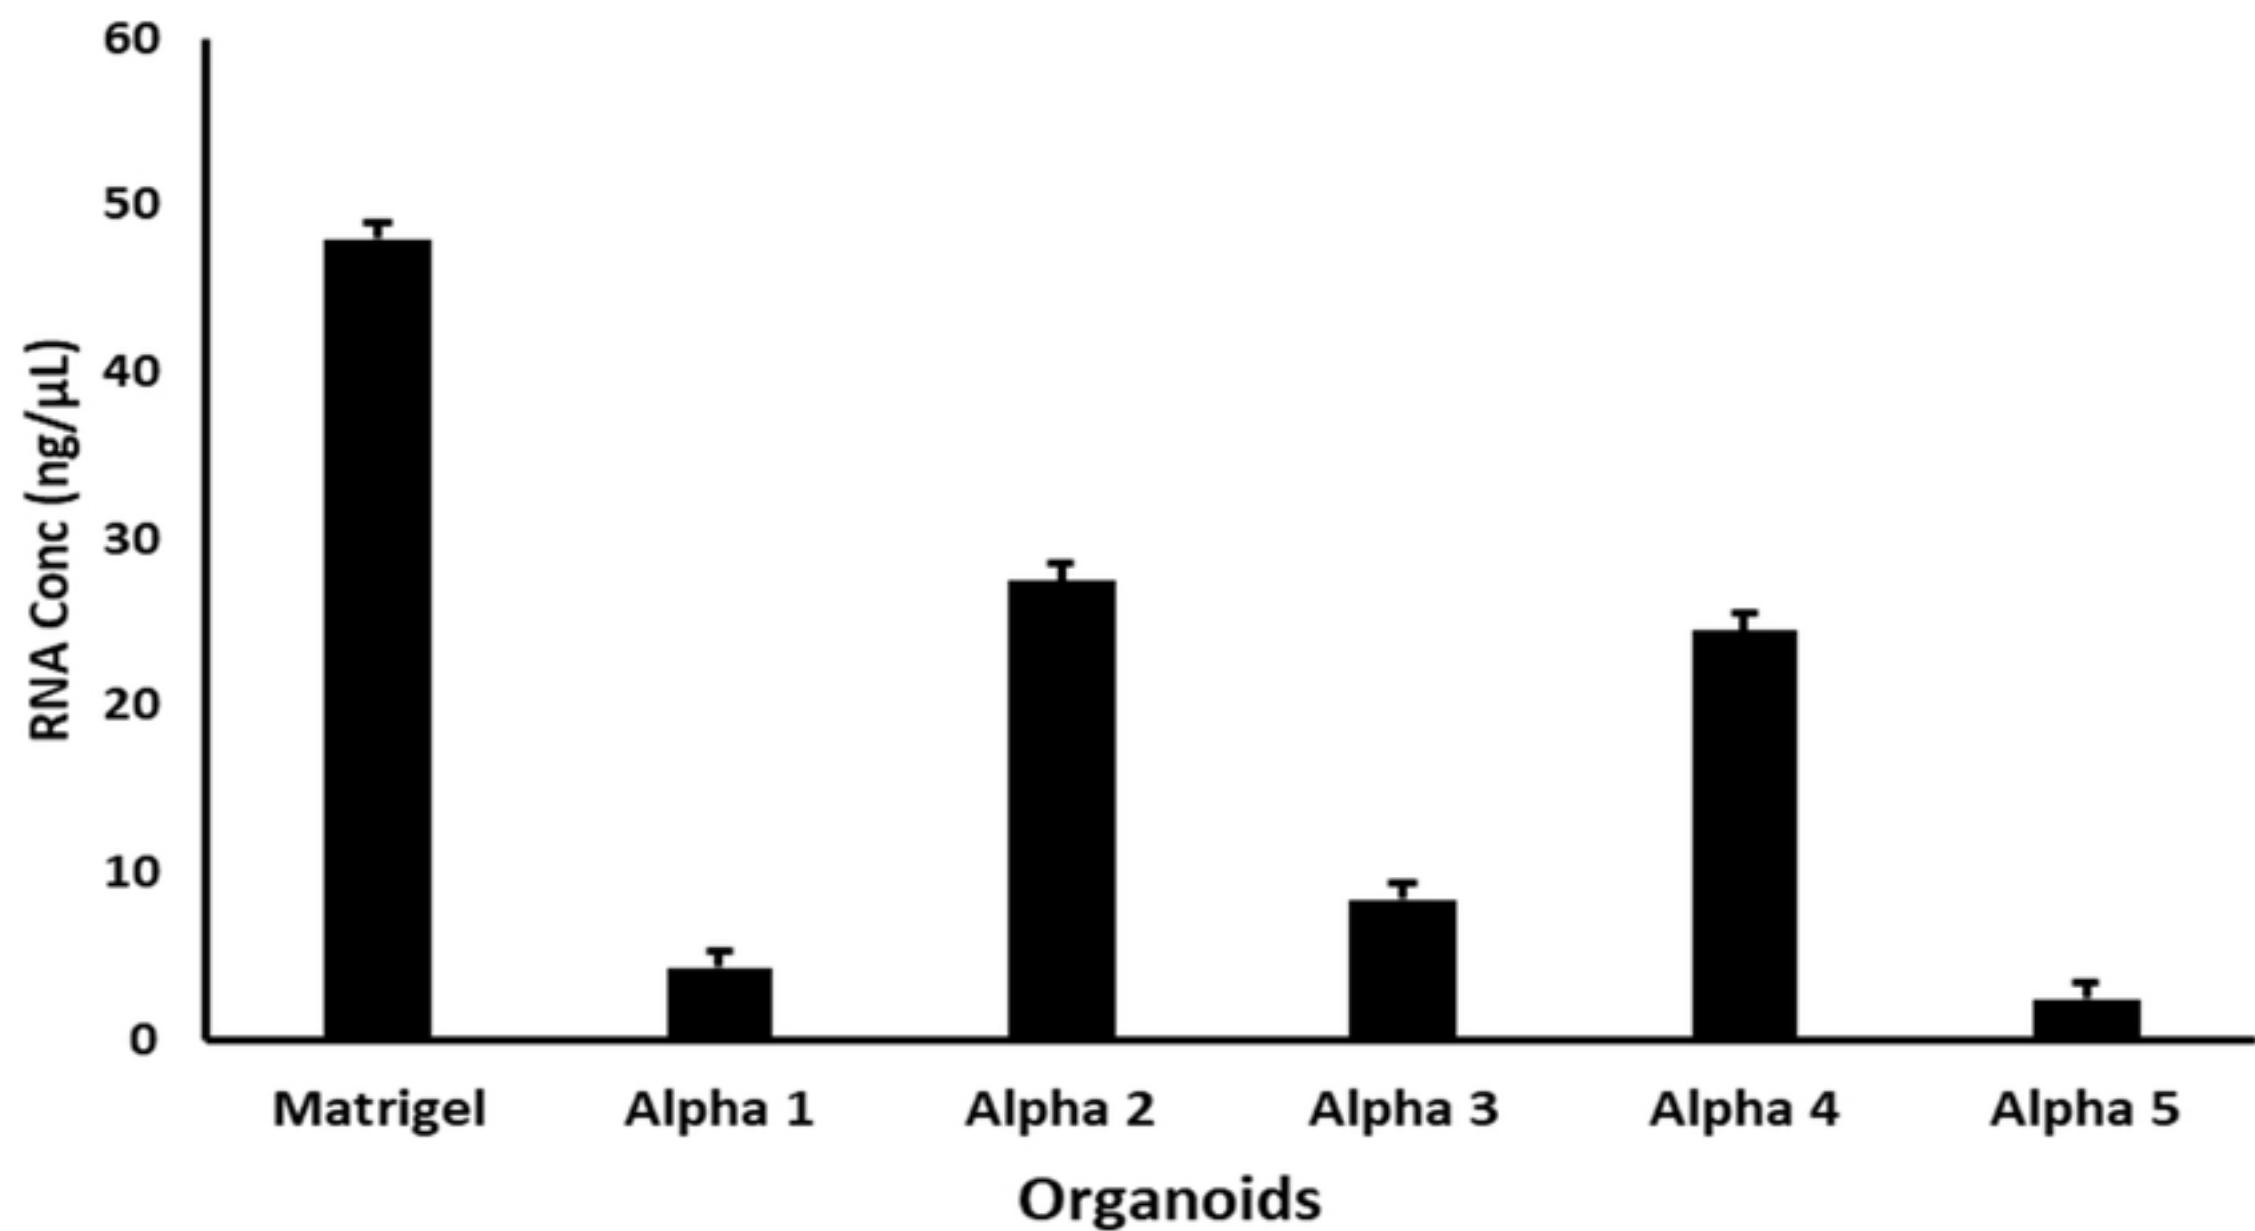

Figure 2a

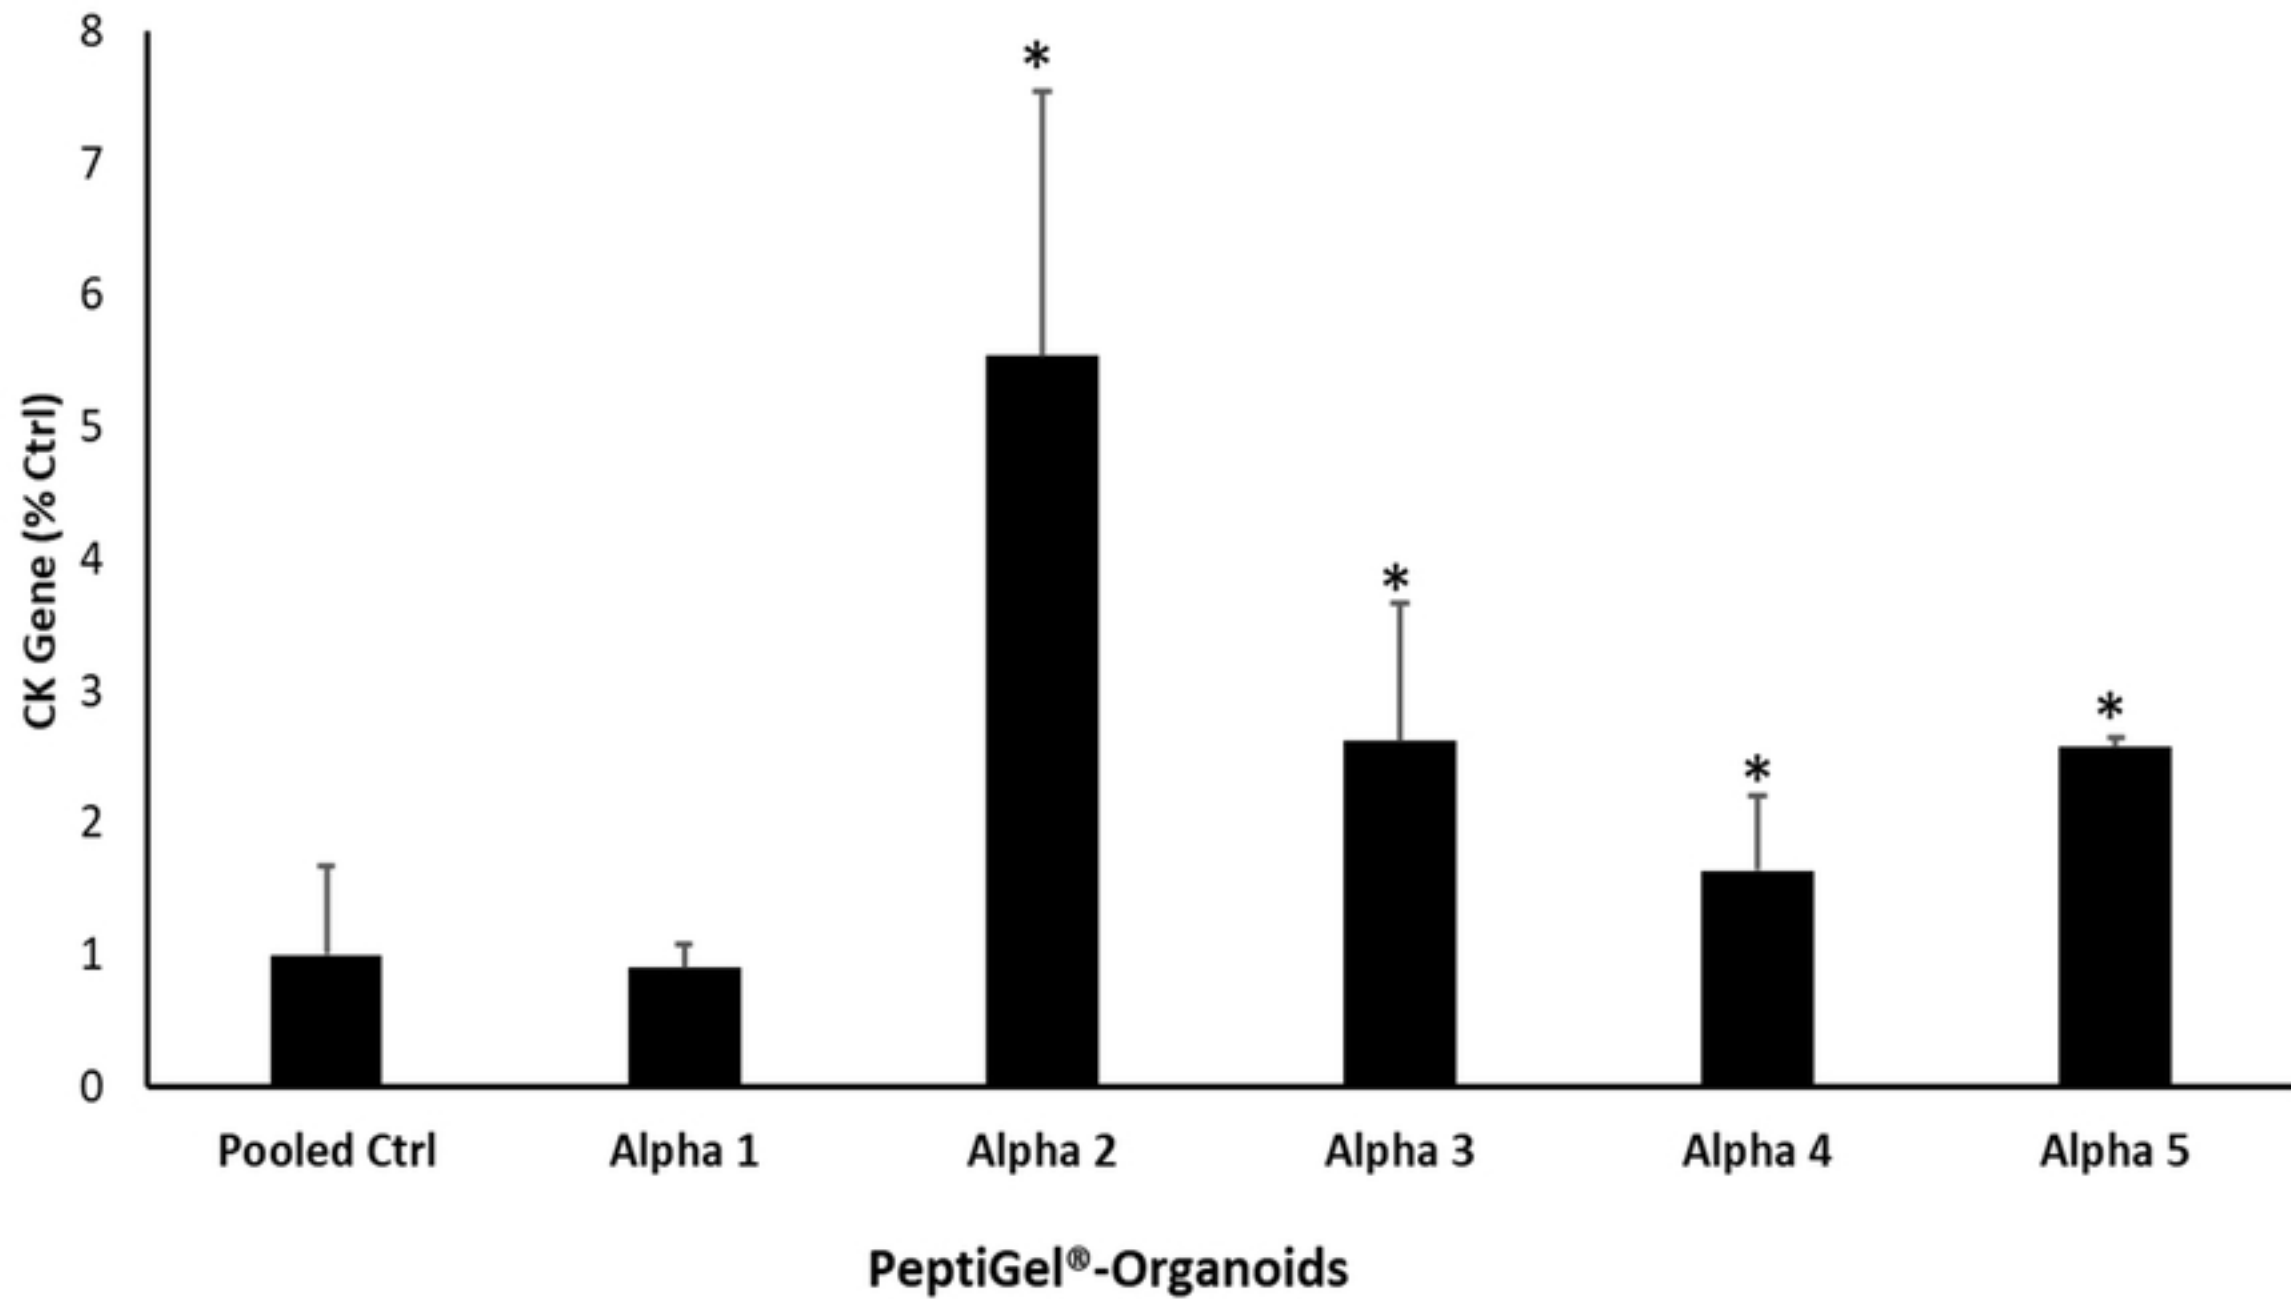

Figure 2b
